# Supplementary material
Source: Springer Nature journal article supplement (https://www.springermedizin.de/resource/supplementary/12911_2014_832_MOESM4_ESM.pdf/9526748)
Supplement: MOESM4 [file 9526748]

|                | Variables                                       | Combined | CHF | AMI | PNA |
|----------------|-------------------------------------------------|----------|-----|-----|-----|
| Comorbidities* | Solid tumor                                     | ●        |     |     | ●   |
|                | Degenerative neurologic disease                 | ●        |     |     | ●   |
|                | Hypertension                                    | ●        |     |     | ●   |
|                | Lymphoma                                        | ●        | ●   |     | ●   |
|                | Abnormal weight loss                            | ●        |     |     |     |
|                | Obesity                                         |          |     |     | ●   |
|                | Liver disease                                   |          | ●   |     |     |
|                | Peripheral vascular disease                     |          | ●   |     |     |
|                | Arrhythmia                                      |          |     |     | ●   |
|                | Metastatic cancer                               |          |     |     | ●   |
|                | Charlson Comorbidity Score                      | ●        |     |     | ●   |
| Demographics   | Race, Black†                                    |          |     | ●   |     |
| Laboratories‡  | Hemoglobin <10 g/dL                             | ●        |     |     | ●   |
|                | Sodium <136 mEq/L                               |          |     | ●   |     |
|                | Calcium <8.6 mg/dL                              |          |     | ●   |     |
| Medications    | Steroid on discharge§                           | ●        |     |     | ●   |
|                | Beta-lactam antibiotic on discharge             |          | ●   |     |     |
|                | Anti-arrhythmic medication on discharge         |          |     |     | ●   |
|                | Anti-depressant on discharge                    |          |     |     | ●   |
|                | Number of discharge meds                        | ●        | ●   |     | ●   |
| Social history | Cocaine use                                     |          | ●   |     |     |
|                | Single marital status**                         | ●        |     |     |     |
| Utilization    | Admission in the prior 30 days                  | ●        | ●   | ●   | ●   |
|                | Emergency department visit in the prior 30 days | ●        | ●   |     |     |
|                | Length of stay                                  | ●        | ●   |     |     |
| Procedures††   | Bronchoscopy or Lung Biopsy                     |          |     |     | ●   |
